# Supplementary material for: Plutonium stabilization and storage research in the DNFSB 94-1 core technology program
Source: Royal Society of Chemistry journal article supplement (doi:10.1039/d4ay00347k), 1998-04-01
Supplement: d4ay00347k1.pdf [file d4ay00347k1.pdf]

## Supporting Information

### Near-infrared responsive gold nanorods for highly sensitive colorimetric and photothermal lateral flow immuno-detection of SARS-CoV-2

Xiaohui Liu<sup>a#</sup>, Jingwen Li<sup>a#</sup>, Kun Wang<sup>a</sup>, Xiang Li<sup>a</sup>, Shenming Wang<sup>a</sup>, Gengchen Guo<sup>a</sup>, Qiaowen Zheng<sup>a</sup>, Maosheng Zhang<sup>b\*</sup>, Jingbin Zeng<sup>a,\*</sup>

*<sup>a</sup> College of Chemistry and Chemical Engineering and State Key Laboratory of heavy oil processing, China University of Petroleum (East China), Qingdao, 266580, China.*

*Email: zengjb@upc.edu.cn*

*<sup>b</sup> College of Chemistry and Environment, Fujian Provincial Key Laboratory of Modern Analytical Science and Separation Technology, Minnan Normal University, Zhangzhou 363000, China.*

*#These authors contributed equally to this work.*

## 1. Experiment Section

**Measurement of photothermal conversion efficiency** To assess the photothermal effects of the four GNRs, the photothermal conversion efficiency was measured and calculated. Temperature changes were monitored by taking 1 mL of water and four GNRs solutions with 808 nm laser irradiation at a power density of 1.69 W/cm<sup>2</sup>. After the temperature was flat and cooled to room temperature, the temperature of the process was recorded with an infrared thermal imager.

Calculate the photothermal conversion efficiency ( $\eta$ ) according to the reported method<sup>[1]</sup>:

$$\eta = \frac{hs(T_{max} - T_{sur}) - hs(T_{max(water)} - T_{sur(water)})}{I(1 - 10^{-A_{808}})}$$

$h$  is the heat transfer coefficient;  $s$  is the surface area of the container.  $I$  is the laser power and  $A$  is the absorbance at 808 nm.  $T_{max(water)}$  is the maximum temperature of water.  $T_{sur(water)}$  is the environmental temperature of water.

$$hs = \frac{mc_{water}}{\tau_s}$$

$m$  is the mass of the water,  $c$  is the specific heat capacity of the water ( $c_{water} = 4.2$  J/(g•°C)), and  $\tau_s$  is the associated time constant.

$$t = -\tau_s \ln(\theta)$$

$\theta$  is the driving force temperature and dimensionless.

$$\theta = \frac{T - T_{sur}}{T_{max} - T_{sur}}$$

$T_{max}$  and  $T_{sur}$  are the maximum temperature and the environmental temperature of solutions, respectively.

## 2. Supporting Figures

## Characterization of GNRs and GNRs-Ab

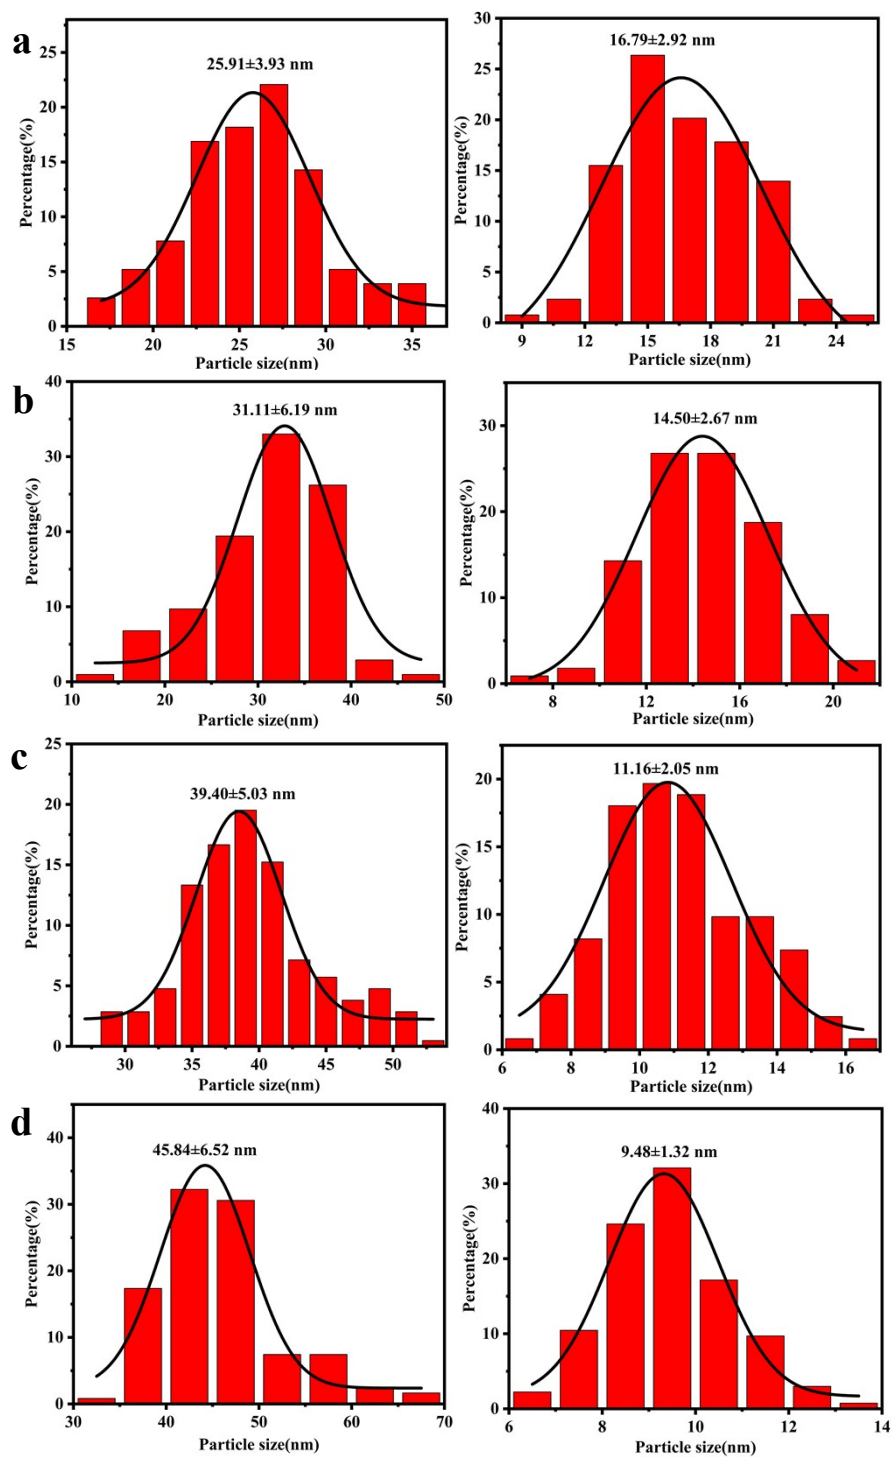

**Fig. S1** Particle size distribution of GNRs with different aspect ratios (a) 1.55 (b) 2.28 (c) 3.56 (4)

4.74 Radial particle size distribution is shown on the left and transverse particle distribution on the

right

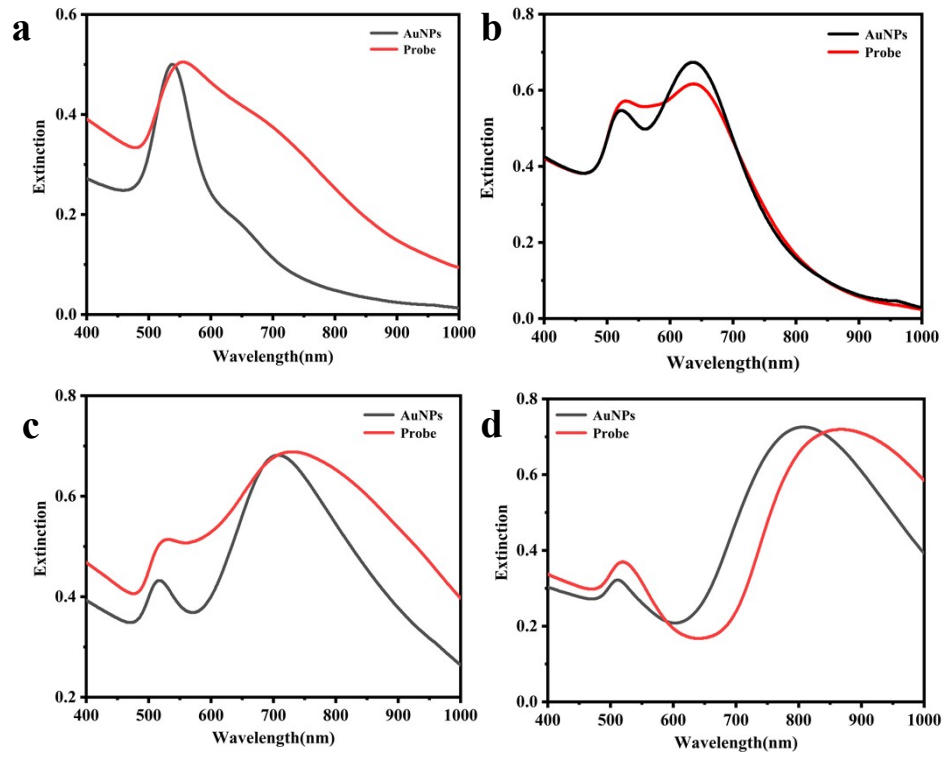

**Fig. S2** UV-visible absorption spectrum of different LSPR absorption wavelength GNRs and GNRs-  
Ab (a) 538 nm (b) 632 nm (c) 726 nm (d) 808 nm

## Optimization of the detection conditions

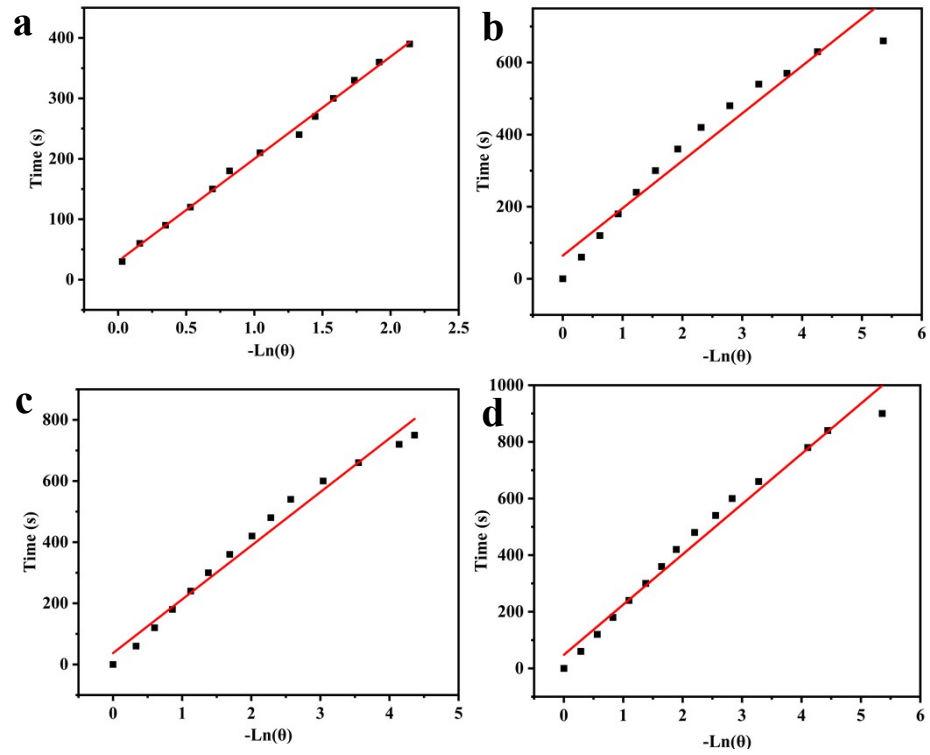

**Fig. S3** Heat transfer time constants for GNRs with four different wavelengths (a) 538 nm (b) 632 nm (c) 726 nm (d) 808 nm

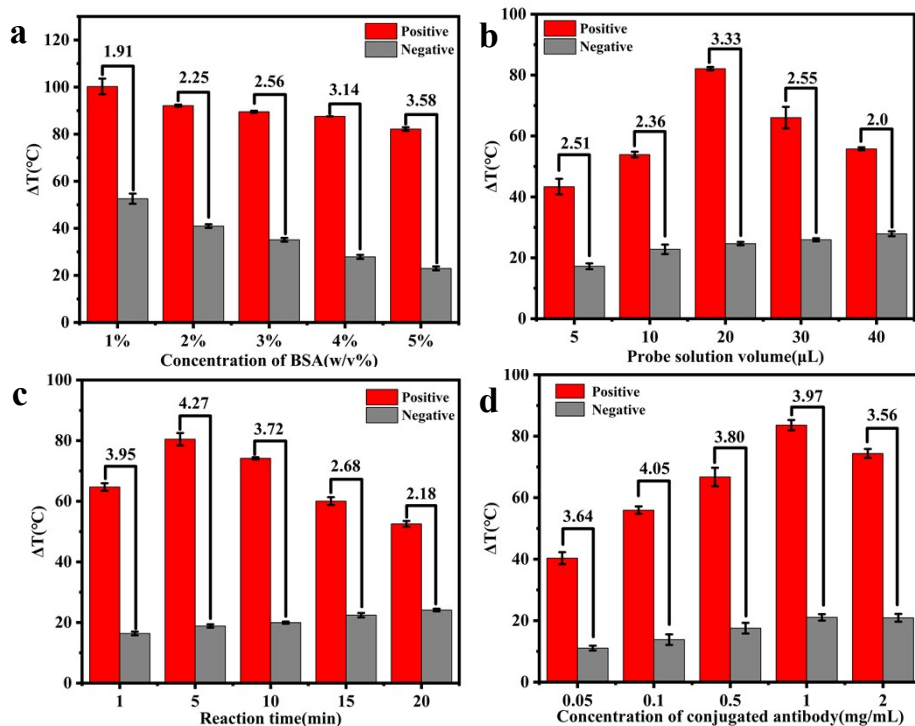

**Fig. S4** Optimization of the photothermal detection conditions (a) Histograms of the photothermal detection signals after sealing of different concentrations of BSA (b) Histograms of photothermal detection signals for different probe amounts (c) Histograms of the photothermal detection signals for different incubation time (d) Histograms of photothermal detection for different amounts of conjugated antibodies. Error bars were calculated from three sets of experiments

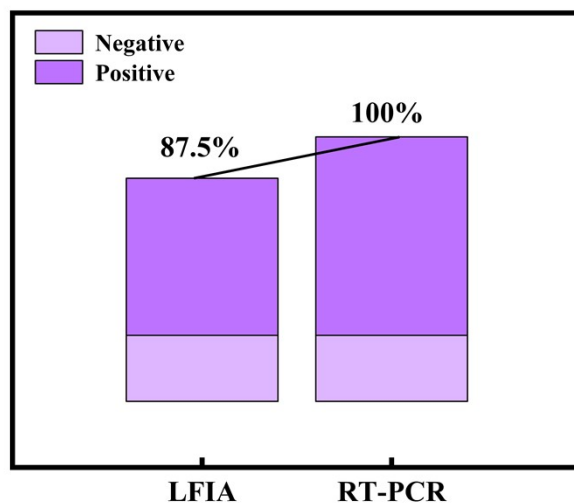

**Fig. S5** Comparison of LFIA strips and RT-PCR for real samples

### 3. Supporting Tables

#### Characterization of GNRs

**Table S1** Transverse and longitudinal absorption peaks of GNRs synthesized with different amounts of silver nitrate

| V(AgNO <sub>3</sub> ) / $\mu$ L | transverse SPR absorption peaks | longitudinal SPR absorption peaks |
|---------------------------------|---------------------------------|-----------------------------------|
| 15                              | 538 nm                          | -                                 |
| 30                              | 534 nm                          | 632 nm                            |
| 60                              | 520 nm                          | 726 nm                            |
| 80                              | 520 nm                          | 808 nm                            |

#### Calculation of detection limits

**Table S2** Data from the photothermal measurements for the calibration curve of Fig.4b

| $\Delta T$ ( $^{\circ}$ C) | Concentration ( $\mu$ g/mL) |        |        |        |        |        |       |  |
|----------------------------|-----------------------------|--------|--------|--------|--------|--------|-------|--|
|                            | 0.4                         | 0.04   | 0.004  | 0.002  | 0.0004 | 0.0002 | 0     |  |
| 1                          | 75.536                      | 50.324 | 35.624 | 27.424 | 21.424 | 15.824 | 6.824 |  |
| 2                          | 75.824                      | 52.844 | 38.624 | 25.124 | 21.924 | 15.624 | 7.425 |  |
| 3                          | 74.014                      | 56.124 | 34.224 | 26.324 | 18.524 | 15.224 | 5.324 |  |
| Mean                       | 75.124                      | 53.097 | 36.157 | 26.290 | 20.624 | 15.557 | 6.524 |  |
| SD                         | 0.972                       | 2.908  | 2.248  | 1.150  | 1.836  | 0.305  | 1.082 |  |

#### Real sample detection

**Table S3** Detailed detection results of the actual samples

| Sample number | LFIA   |        | Mingde Ct value |   |
|---------------|--------|--------|-----------------|---|
|               | C-line | T-line | ORF1ab          | N |

---

|     |   |    |       |       |
|-----|---|----|-------|-------|
| P01 | + | +  | 27.71 | 27.37 |
| P02 | + | ++ | 23.6  | 23.15 |
| P03 | + | +  | 20.82 | 20.29 |
| P04 | + | -  | 27.7  | 26.41 |
| P05 | + | ++ | 21.73 | 20.73 |
| P06 | + | ++ | 17.69 | 17.74 |
| P07 | + | -  | 25.53 | 24.46 |
| P08 | + | -  | 27.49 | 27.33 |
| P09 | + | +  | 24.4  | 24.8  |
| P10 | + | +  | 18.96 | 18.48 |
| P11 | + | ++ | 21.64 | 20.71 |
| P12 | + | -  | 21.68 | 21.59 |
| P13 | + | +  | 27.87 | 27.45 |
| P14 | + | ++ | 20.62 | 21.33 |
| P15 | + | -  | 24.85 | 24.34 |
| P16 | + | +  | 21.41 | 20.56 |
| P17 | + | +  | 20.91 | 20.57 |
| P18 | + | ++ | 23.37 | 23.5  |
| P19 | + | ++ | 20.43 | 20.37 |
| P20 | + | +  | 19.66 | 19.84 |
| P21 | + | +  | 23.51 | 23.3  |
| P22 | + | +  | 27.39 | 27.21 |
| P23 | + | +  | 22.64 | 22.34 |

---



|     |   |    |       |       |
|-----|---|----|-------|-------|
| P24 | + | ++ | 21.82 | 21.89 |
| P25 | + | ++ | 21.89 | 21.9  |
| P26 | + | +  | 22.86 | 21.95 |
| P27 | + | ++ | 19.7  | 18.77 |
| P28 | + | ++ | 21.31 | 20.69 |
| P29 | + | +  | 22.74 | 22.74 |
| P30 | + | +  | 18.99 | 19.14 |
| P31 | + | +  | 23.17 | 22.77 |
| P32 | + | +  | 26.93 | 25.71 |
| N01 | + | -  | -     | -     |
| N02 | + | -  | -     | -     |
| N03 | + | -  | -     | -     |
| N04 | + | -  | -     | -     |
| N05 | + | -  | -     | -     |
| N06 | + | -  | -     | -     |
| N07 | + | -  | -     | -     |
| N08 | + | -  | -     | -     |

The samples tested were samples of uninactivated COVID-19 cases. Sample number P was positive and N was negative. “+” means that the stripe shows color; “++” means that the stripe shows a darker color.; “-” indicates that the stripe does not show color. The Ct value is the basis for determining the infection. The Ct value less than 35 means a positive test result.

**Table S4** Summary of the analytical performances of the detection of SARS-CoV-2 N protein with different methods

| <b>Method</b>         | <b>Label</b>            | <b>Signal</b> | <b>LOD</b>     | <b>Ref</b>        |
|-----------------------|-------------------------|---------------|----------------|-------------------|
| Microfluidic<br>ELISA | TMB enzyme              | Color         | 0.013<br>ng/mL | [2]               |
| Fluid array           | MagPlex<br>microspheres | Fluorescence  | 0.050<br>ng/mL | [3]               |
| LFIA                  | Au@4-MBA@Ag             | Raman         | 0.03 ng/mL     | [4]               |
| LFIA                  | AIEgens                 | Fluorescence  | 7.2 ng/mL      | [5]               |
| LFIA                  | CNB                     | Color         | > 1 ng/mL      | [6]               |
| LFIA                  | Latex beads             | Color         | 0.65 ng/mL     | [7]               |
| LFIA                  | Au NPs                  | Color         | 40 ng/mL       | Previous work [8] |
| LFIA                  | Au NRs                  | Photothermal  | 0.096 ng/mL    | This work         |

## Reference

- [1] Xi, D.M., Xiao, M., Cao, J.F., Zhao, L.Y., Xu, N., Long, S., Fan J.L., Shao, K., Sun, W., Yan, X.H., Peng, X.J., 2020. *Adv. Mater.* 32(11), e1907855.
- [2] Bhuiyan, N.H., Uddin, M.J., Lee, J., Hong, J.H., Shim, J.S., 2022. *Advanced Materials Technologies* 7(9), 2101690.
- [3] Anderson, G.P., Liu, J.L., Esparza, T.J., Voelker, B.T., Hofmann, E.R., Goldman, E.R., 2021. *Anal. Chem.* 93(19), 7283-7291.
- [4] Lai, S., Liu, Y., Fang, S., Wu, Q., Fan, M., Lin, D., Lin, J., Feng, S., 2023. *J. Biophotonics.* 16, e202300004.
- [5] Zhang, G.Q., Gao, Z., Zhang, J., Ou, H., Gao, H., Kwok, R.T.K., Ding, D., Tang, B.Z., 2022. *Cell Rep Phys Sci* 3(2), 100740.
- [6] Kim, H.Y., Lee, J.H., Kim, M.J., Park, S.C., Choi, M., Lee, W., Ku, K.B., Kim, B.T., Changkyun Park, E., Kim, H.G., Kim, S.I., 2021. *Biosens. Bioelectron.* 175, 112868.
- [7] Grant, B.D., Anderson, C.E., Williford, J.R., Alonzo, L.F., Glukhova, V.A., Boyle, D.S., Weigl, B.H., Nichols, K.P., 2020. *Anal. Chem.* 92(16), 11305-11309.
- [8] Li, X., Yu, D., Li, H.W., Sun, R.C., Zhang, Z.R., Zhao, T.Y., Guo, G.C., Zeng, J.B., Wen, C.Y., 2023. *Biosens. Bioelectron.* 241, 115688.
